# Supplementary material
Source: MDPI journal article supplement (https://www.mdpi.com/2073-4352/12/8/1068)
Supplement: s1 [file s1]

## Supplementary data

Figure S1. Non-covalent interaction between pesticides (dia and par)/antibiotics (oxa and cip) and graphene (CC).

Figure S2. Non-covalent interaction between pesticides (dia and par)/antibiotics (oxa and cip) and hexagonal boron nitride (h-BN).

Figure S3. Co-adsorption structures of pesticides (a) dia and (b) par and microcystin-LR (mc) on graphene (CC).

Figure S4. Co-adsorption structures of antibiotics (a) oxa and (b) cip and microcystin-LR (mc) on graphene (CC).

Figure S5. Co-adsorption structures of pesticides (a) dia and (b) par and microcystin-LR (mc) on hexagonal boron nitride (h-BN).

Figure S6. Co-adsorption structures of antibiotics (a) oxa and (b) cip and microcystin-LR (mc) on hexagonal boron nitride (h-BN).

*Non Covalent Interaction (NCI)*

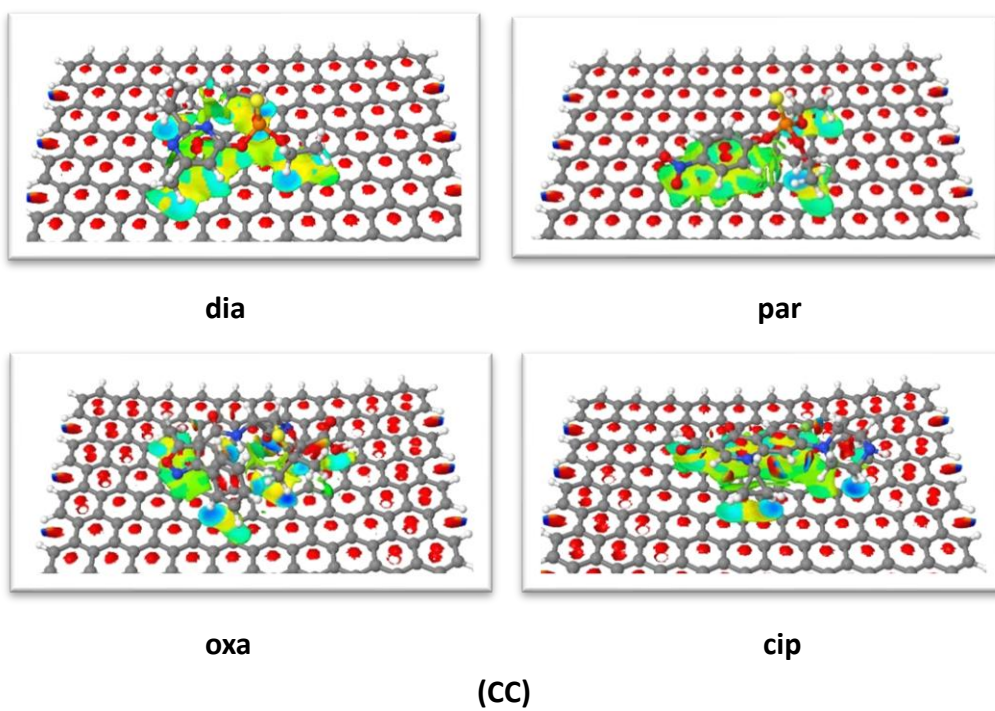

Figure S1. Non-covalent interaction between pesticides (dia and par)/antibiotics (oxa and cip) and graphene (CC).

*Non Covalent Interaction (NCI)*

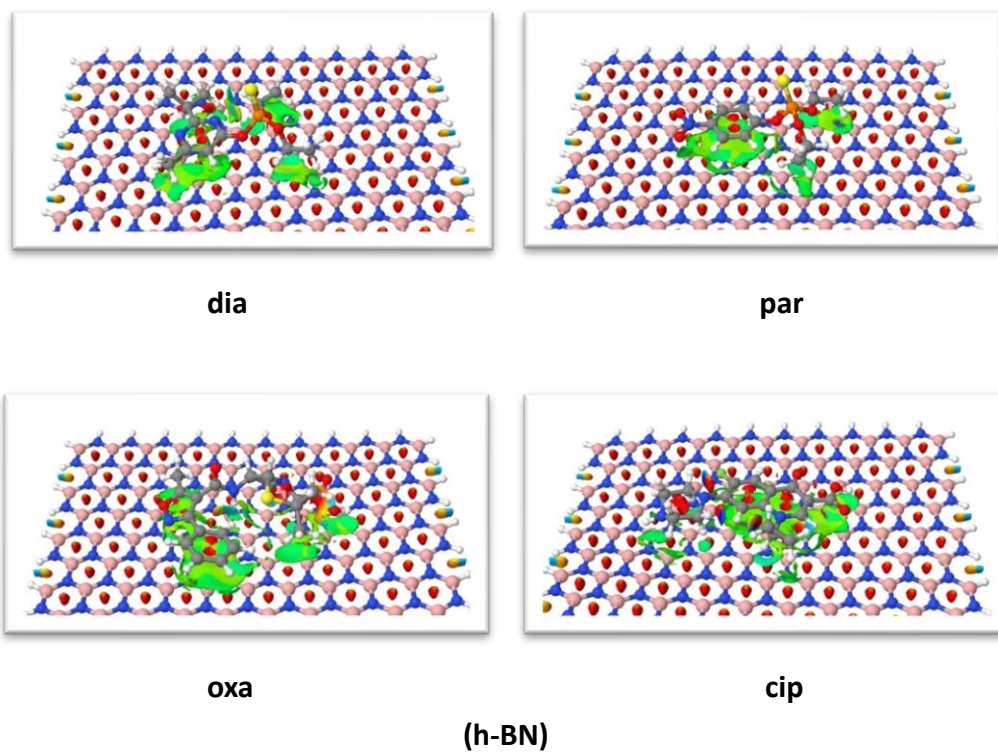

Figure S2. Non-covalent interaction between pesticides (dia and par)/antibiotics (oxa and cip) and hexagonal boron nitride (h-BN).

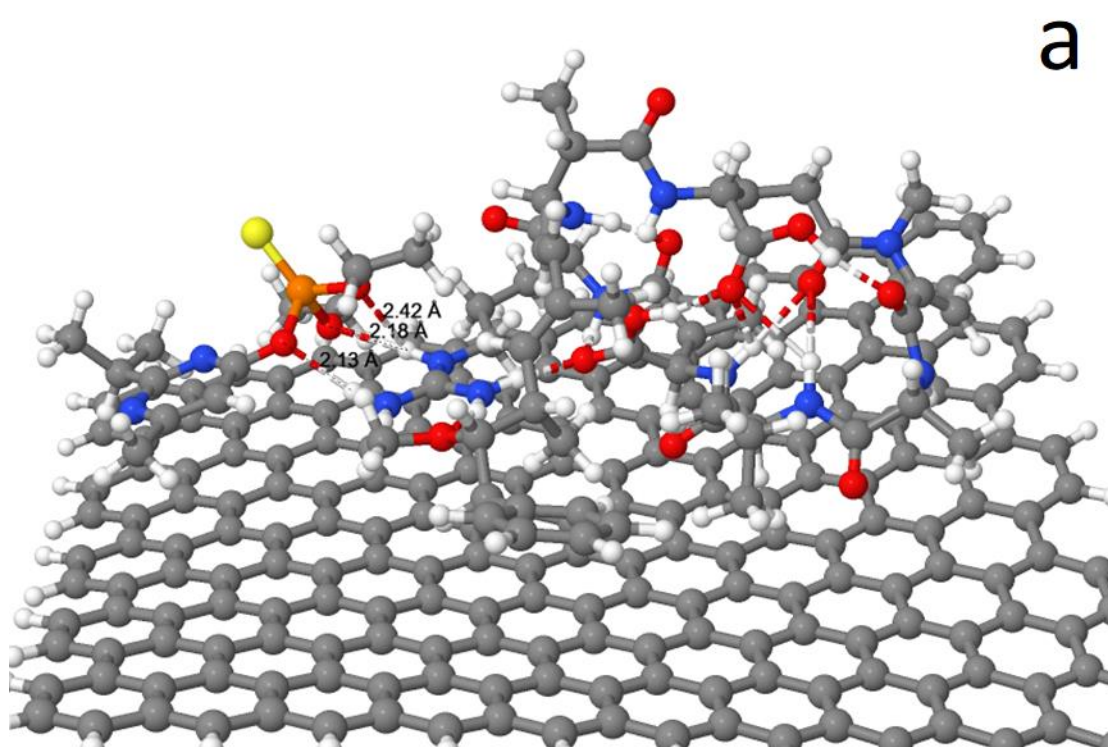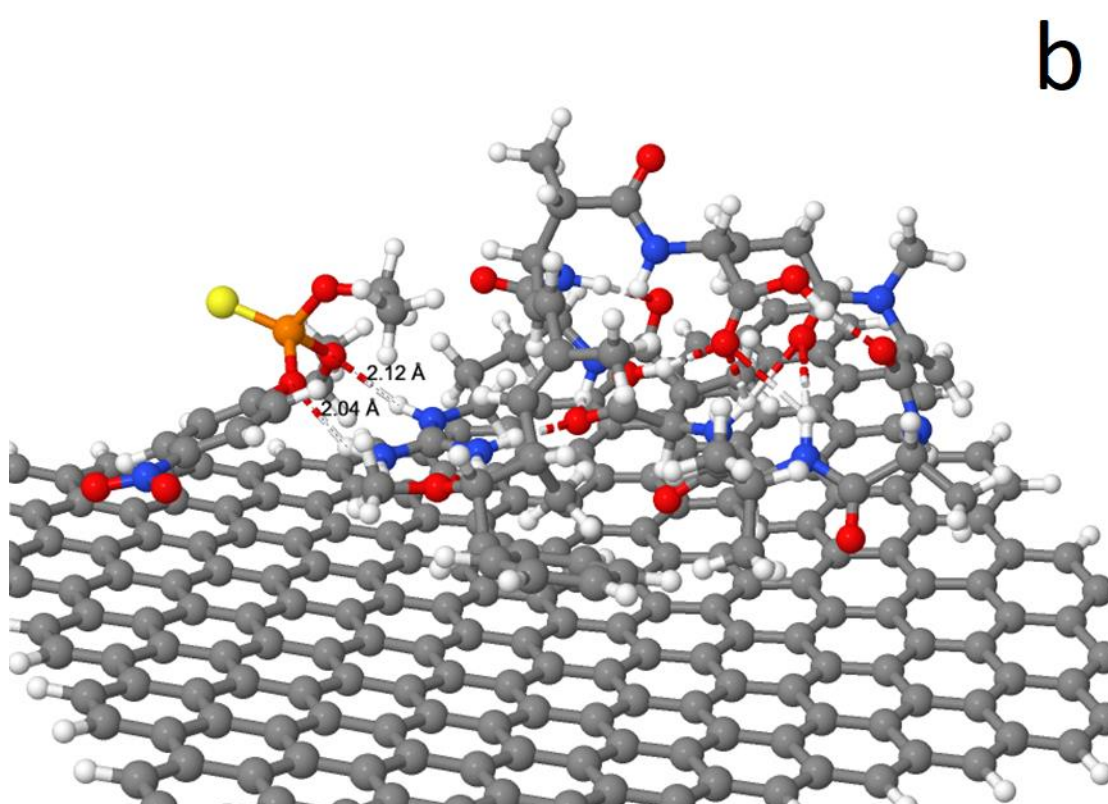

Figure S3. Co-adsorption structure of pesticides (a) dia and (b) par and microcystin-LR (mc) on graphene (CC).



a

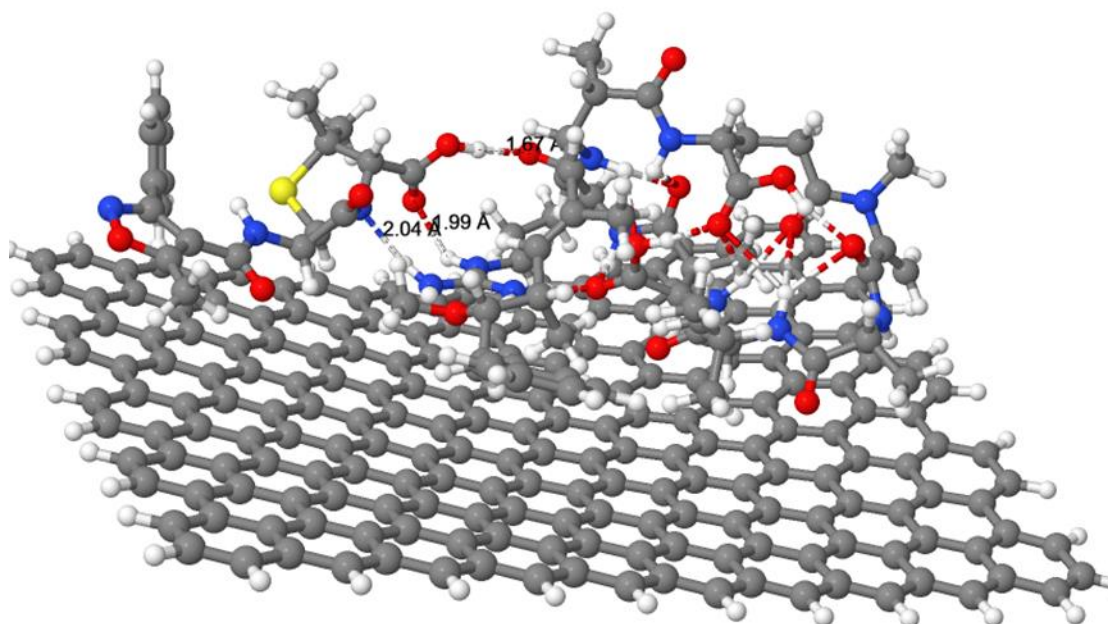

b

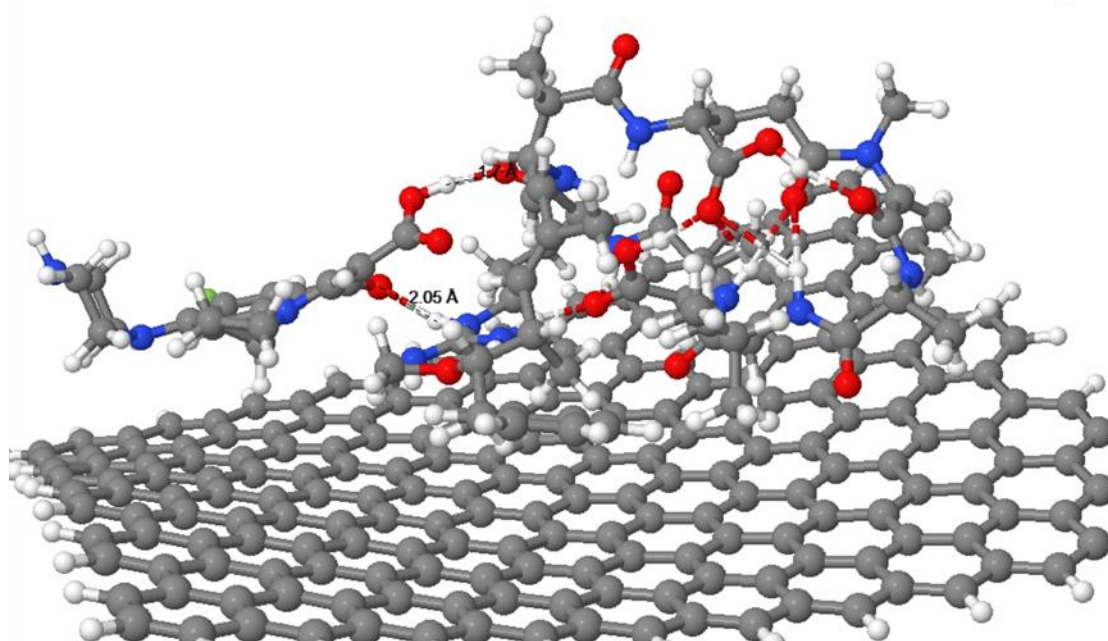

Figure S4. Co-adsorption structure of antibiotics (a) oxa and (b) cip and microcystin-LR (mc) on graphene (CC).

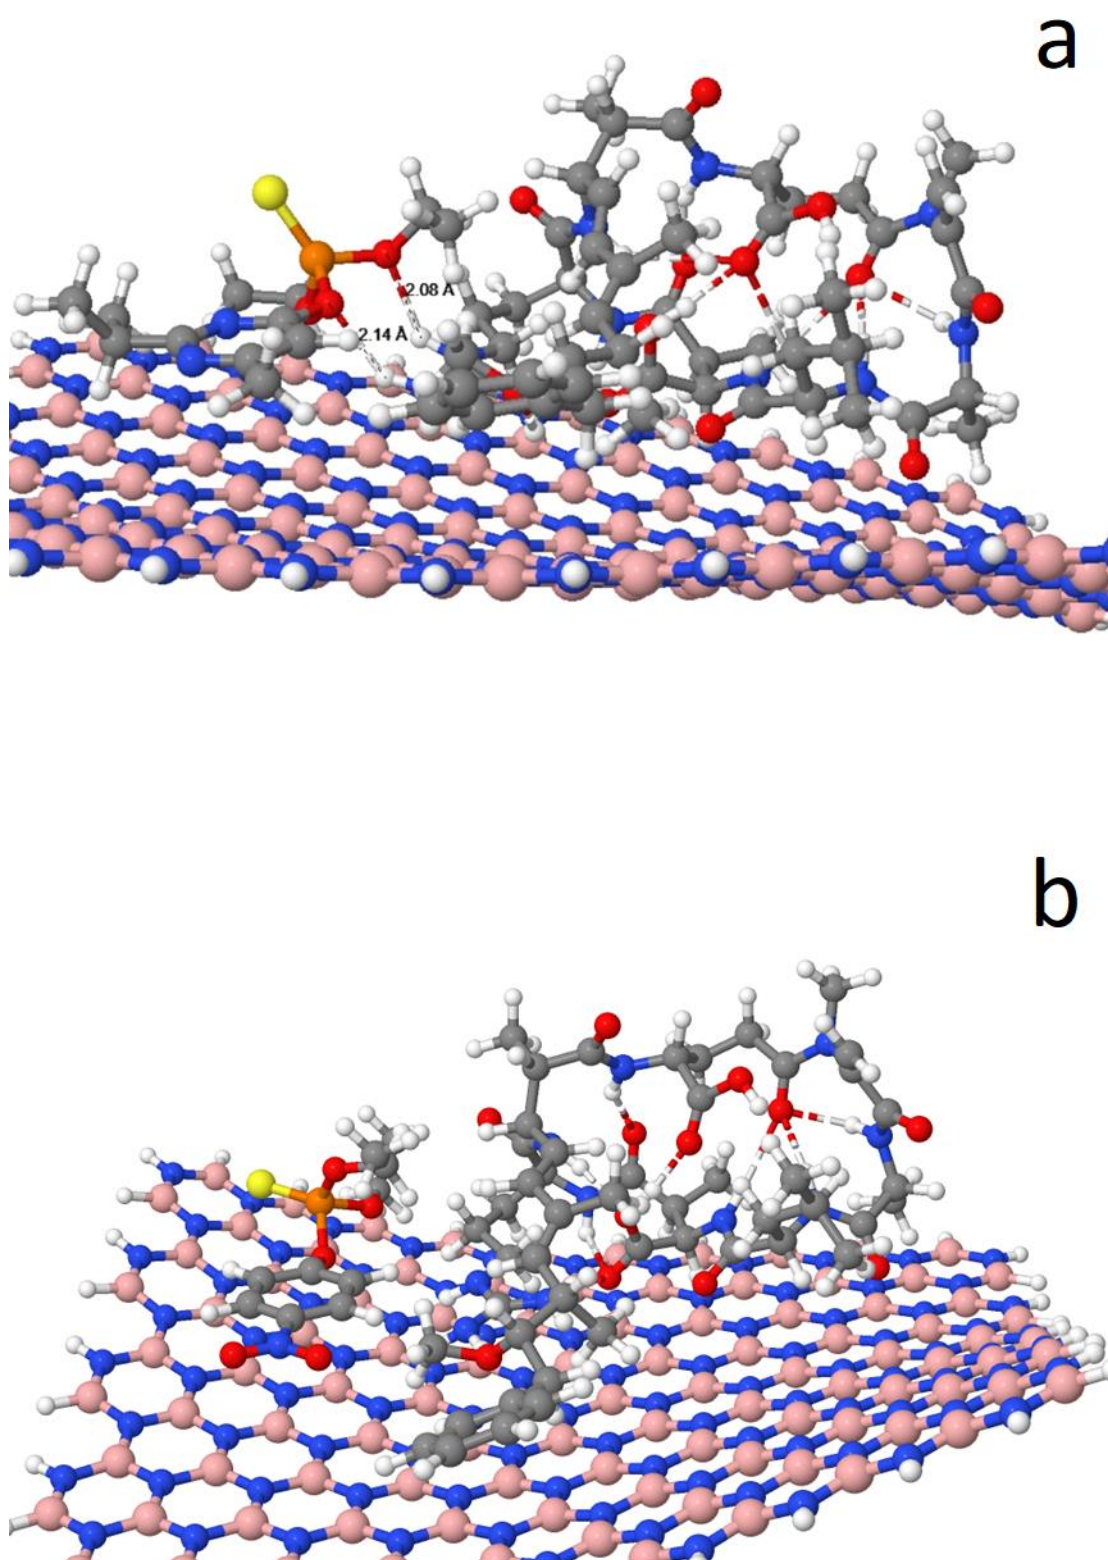

Figure S5. Co-adsorption structure of pesticides (a) dia and (b) par and microcystin-LR (mc) on hexagonal boron nitride (h-BN).



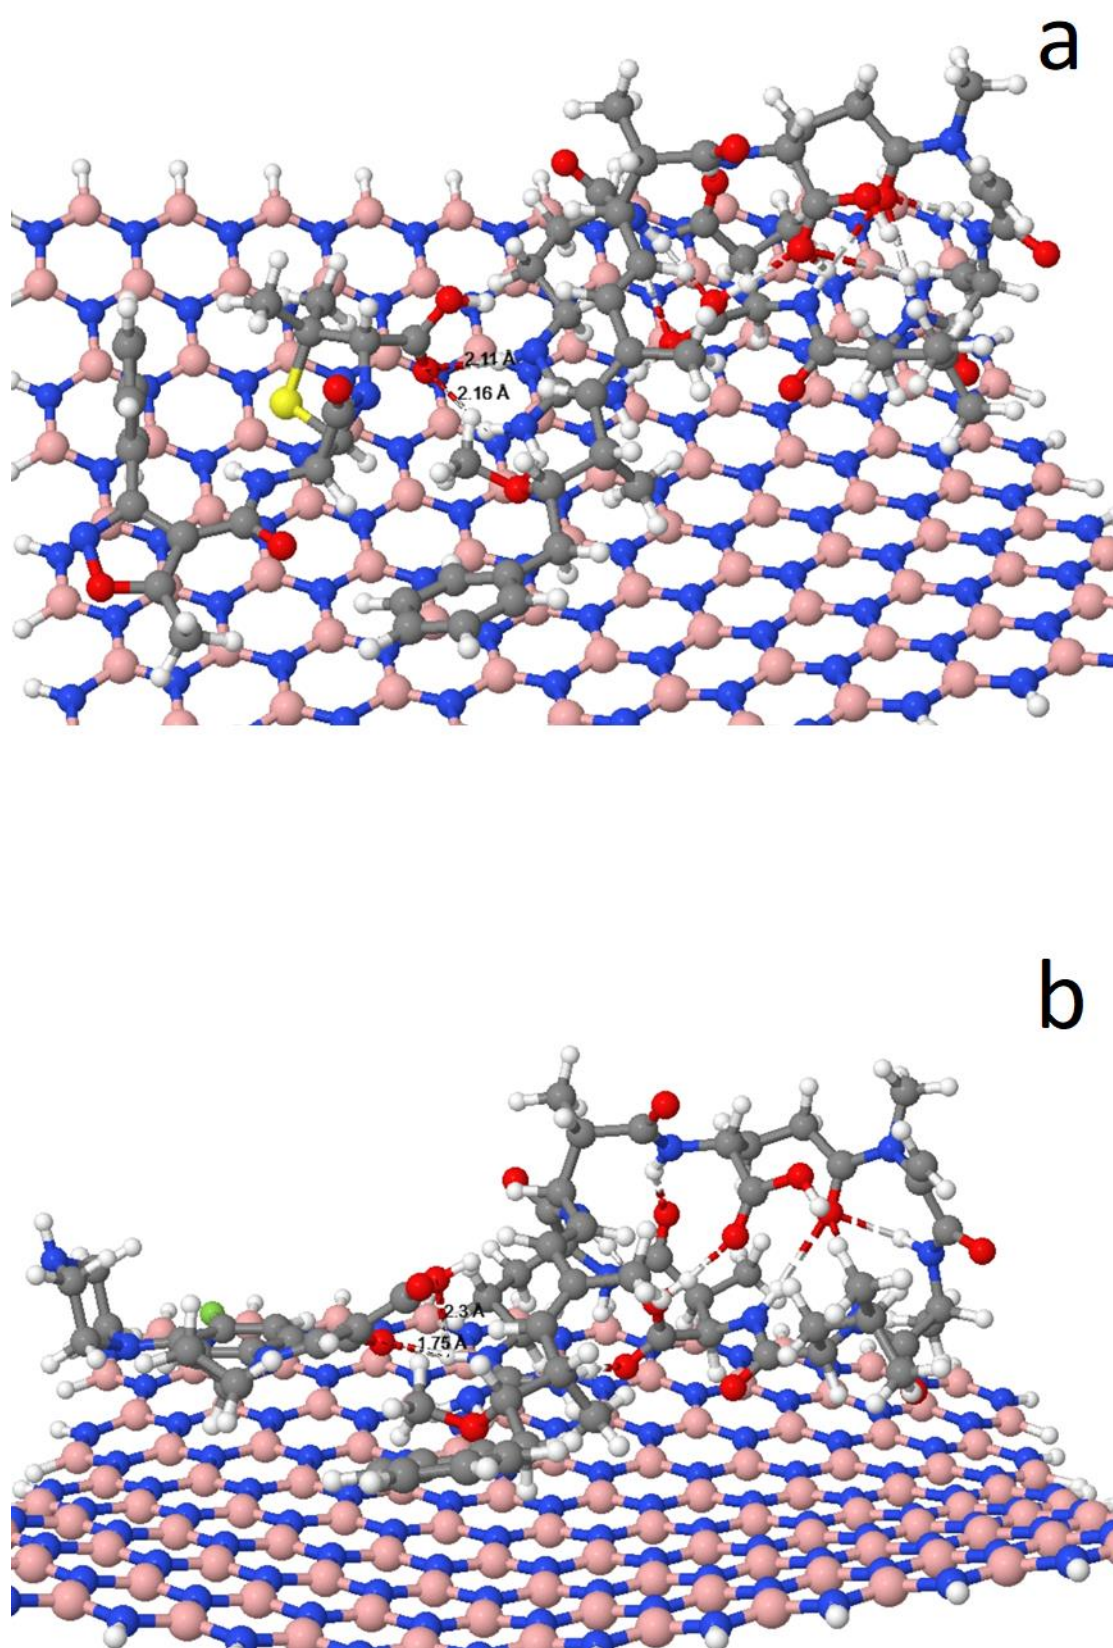

Figure S6. Co-adsorption structure of antibiotics (a) oxa and (b) cip and microcystin-LR (mc) on hexagonal boron nitride (h-BN).
